# Supplementary material for: Molecular Identification and Prevalence of the Mite Carpoglyphus lactis (Acarina: Carpoglyphidae) in Apis mellifera in the Republic of Korea
Source: MDPI journal article supplement (doi:10.3390/insects15040271), 2024-04-14
Supplement: s1 [file s1]

[illegible][illegible][illegible][illegible]

|               |            |            |            |            |            |            |            |           |           |            |
|---------------|------------|------------|------------|------------|------------|------------|------------|-----------|-----------|------------|
| MN073839.1-Ch | TATTGTCACT | ATTTTAAACA | TAAAAACTTT | AAGCATAAGA | TGTCCTAATG | TTCCCTTAAT | TGTTTGATCT | GTTTGATTA | CTCTTTTCT | CTTAGCTTTT |
| NC048990.1-Ch | .          | .          | .          | T.         | A.         | .          | .          | .         | .         | .          |
| KY922482.1-UK | .          | .          | .          | .          | .          | .          | .          | .         | .         | .          |
| GN-KOR1       | .          | .          | T.         | .          | .          | .          | .          | .         | .         | .          |
| JN-KOR2       | .          | C.         | .          | T.         | A.         | .          | .          | .         | .         | .          |
| GN-KOR3       | .          | C.         | .          | T.         | A.         | .          | .          | .         | .         | .          |
| GB-KOR1       | .          | C.         | .          | T.         | A.         | .          | .          | .         | .         | .          |
| JN-KOR4       | .          | C.         | .          | T.         | A.         | .          | .          | .         | .         | .          |
| JN-KOR1       | .          | C.         | .          | T.         | A.         | .          | .          | .         | .         | .          |
| SG-KOR1       | .          | C.         | .          | T.         | A.         | .          | .          | .         | .         | .          |
| CN-KOR1       | .          | C.         | .          | T.         | A.         | .          | .          | .         | .         | .          |
| CB-KOR1       | .          | C.         | .          | T.         | A.         | .          | .          | .         | .         | .          |
| CB-KOR2       | .          | C.         | .          | T.         | A.         | .          | .          | .         | .         | .          |
| JN-KOR3       | .          | C.         | .          | T.         | A.         | .          | .          | .         | .         | .          |
| GB-KOR2       | .          | C.         | .          | T.         | A.         | .          | .          | .         | .         | .          |
| GN-KOR2       | .          | C.         | .          | T.         | A.         | .          | .          | .         | .         | .          |
| JB-KOR2       | .          | C.         | .          | T.         | A.         | .          | .          | .         | .         | .          |
| JB-KOR1       | .          | C.         | .          | T.         | A.         | .          | .          | .         | .         | .          |
| GW-KOR1       | .          | C.         | .          | T.         | A.         | .          | .          | .         | .         | .          |
| CN-KOR2       | .          | C.         | .          | T.         | A.         | .          | .          | .         | .         | .          |
| CN-KOR3       | .          | C.         | .          | T.         | A.         | .          | .          | .         | .         | .          |
| JB-KOR3       | .          | C.         | .          | T.         | A.         | .          | .          | .         | .         | .          |

| Accession     | Sequence                                                                                                      |
|---------------|---------------------------------------------------------------------------------------------------------------|
| MN073839.1-Ch | TCCTTACCTG TATTAGCTGG TGCCTCTACT ATACTATTAA CAGATCGTAA TTTTAACACT ACTTTTTTTG ACCCTGTAGG AGGAGGTGAC CCTATCCTCT |
| NC048990.1-Ch | .....T.                                                                                                       |
| KY922482.1-UK | .....                                                                                                         |
| GN-KOR1       | .....                                                                                                         |
| JN-KOR2       | .....                                                                                                         |
| GN-KOR3       | .....                                                                                                         |
| GB-KOR1       | .....                                                                                                         |
| JN-KOR4       | .....                                                                                                         |
| JN-KOR1       | .....                                                                                                         |
| GG-KOR1       | .....                                                                                                         |
| CN-KOR1       | .....                                                                                                         |
| CB-KOR1       | .....                                                                                                         |
| CB-KOR2       | .....                                                                                                         |
| JN-KOR3       | .....                                                                                                         |
| GB-KOR2       | .....                                                                                                         |
| GN-KOR2       | .....                                                                                                         |
| JB-KOR2       | .....                                                                                                         |
| JB-KOR1       | .....                                                                                                         |
| GW-KOR1       | .....                                                                                                         |
| CN-KOR2       | .....                                                                                                         |
| CN-KOR3       | .....T.                                                                                                       |
| JB-KOR3       | .....                                                                                                         |

| Accession  | Strain | Sequence                                                                                                      |
|------------|--------|---------------------------------------------------------------------------------------------------------------|
| MN073839.1 | -Ch    | ACCAACATCT TTTCTGATTC TTTGGCCACC CAGAGGTTTA TATTCTTATT TTACCAGGCT TTGGTATTAT TTCTCATACA GTTATAACTT ACAGAAATAA |
| NC048990.1 | -Ch    | .....                                                                                                         |
| KY922482.1 | -UK    | .T.....                                                                                                       |
| GN-KOR1    |        | .....C.....                                                                                                   |
| JN-KOR2    |        | .....                                                                                                         |
| GN-KOR3    |        | .....G.....                                                                                                   |
| GB-KOR1    |        | .....G.....                                                                                                   |
| JN-KOR4    |        | .....G.....                                                                                                   |
| JN-KOR1    |        | .....G.....                                                                                                   |
| GG-KOR1    |        | .....G.....                                                                                                   |
| CN-KOR1    |        | .....G.....                                                                                                   |
| CB-KOR1    |        | .....G.....                                                                                                   |
| CB-KOR2    |        | .....                                                                                                         |
| JN-KOR3    |        | .....                                                                                                         |
| GB-KOR2    |        | .....G.....                                                                                                   |
| GN-KOR2    |        | .....                                                                                                         |
| JB-KOR2    |        | .....G.....                                                                                                   |
| JB-KOR1    |        | .....G.....                                                                                                   |
| GW-KOR1    |        | .....G.....                                                                                                   |
| CN-KOR2    |        | .....                                                                                                         |
| CN-KOR3    |        | .T.....                                                                                                       |
| JB-KOR3    |        | .....                                                                                                         |

| Accession | Strand | Sequence                                                                                                     |
|-----------|--------|--------------------------------------------------------------------------------------------------------------|
| MN073839  | 1-Ch   | AAGGGAACCT TTTGGAGGAT TGGGTATAAT TTATGCTATA GTTTCATATG GGACCTTAGG TTTTATTGTG TGGGCTCACC ACATATTAC TGTAGGCTTA |
| NC048990  | 1-Ch   | .....                                                                                                        |
| KY922482  | 1-UK   | .....                                                                                                        |
| GN-KOR1   |        | .....                                                                                                        |
| JN-KOR2   |        | .....                                                                                                        |
| GN-KOR3   |        | .....                                                                                                        |
| GB-KOR1   |        | .....                                                                                                        |
| JN-KOR4   |        | .....                                                                                                        |
| JN-KOR1   |        | .....                                                                                                        |
| GC-KOR1   |        | .....                                                                                                        |
| CN-KOR1   |        | .....                                                                                                        |
| CB-KOR1   |        | .....                                                                                                        |
| CB-KOR2   |        | .....                                                                                                        |
| JN-KOR3   |        | .....                                                                                                        |
| GB-KOR2   |        | .....                                                                                                        |
| GN-KOR2   |        | .....                                                                                                        |
| JB-KOR2   |        | .....                                                                                                        |
| JB-KOR1   |        | .....                                                                                                        |
| GW-KOR1   |        | .....                                                                                                        |
| CN-KOR2   |        | .....                                                                                                        |
| CN-KOR3   |        | .....                                                                                                        |
| JB-KOR3   |        | .....                                                                                                        |

|               |            |            |             |            |            |            |            |            |            |            |   |
|---------------|------------|------------|-------------|------------|------------|------------|------------|------------|------------|------------|---|
|               | 810        | 820        | 830         | 840        | 850        | 860        | 870        | 880        | 890        | 900        |   |
| MN073839.1-Ch | GATGTTGACA | CTCGAGCCTA | TTTACTGCT   | GCTACAATGA | TTATTGCTGT | TCTACTGGG  | GTAAAGTAT  | TTAGTTGGCT | AGCTACTATA | ATAGGAGGCT |   |
| NC048990.1-Ch |            |            |             |            |            |            |            |            |            |            |   |
| KY922482.1-UK |            |            |             |            |            |            | G          |            |            |            |   |
| GN-KOR1       |            |            |             |            |            |            |            |            |            |            |   |
| JN-KOR2       |            |            |             |            |            |            |            |            |            |            |   |
| GN-KOR3       |            |            |             |            |            |            |            |            |            |            |   |
| GB-KOR1       |            |            |             |            |            |            |            |            |            |            |   |
| JN-KOR4       |            |            |             |            |            |            |            |            |            |            |   |
| JN-KOR1       |            |            |             |            |            |            |            |            |            |            |   |
| GG-KOR1       |            |            |             |            |            |            | G          |            |            |            |   |
| CN-KOR1       |            |            |             |            |            |            |            |            |            |            |   |
| CB-KOR1       |            |            |             |            |            |            |            |            |            |            |   |
| CB-KOR2       |            |            |             |            |            |            |            |            |            |            |   |
| JN-KOR3       |            |            |             |            |            |            |            |            |            |            |   |
| GB-KOR2       |            |            |             |            |            |            |            |            |            |            |   |
| GN-KOR2       |            |            |             |            |            |            | G          |            |            |            |   |
| JB-KOR2       |            |            |             |            |            |            |            |            |            |            |   |
| JB-KOR1       |            |            |             |            |            |            |            |            |            |            |   |
| GW-KOR1       |            |            |             |            |            |            |            |            |            |            |   |
| CN-KOR2       |            |            |             |            |            |            |            |            |            |            |   |
| CN-KOR3       |            |            |             |            |            |            |            |            |            |            |   |
| JB-KOR3       |            |            |             |            |            |            |            |            |            |            |   |
|               | 910        | 920        | 930         | 940        | 950        | 960        | 970        | 980        | 990        | 1000       |   |
| MN073839.1-Ch | ATGTTAACTT | CACCCCTTCT | TTTATTGAT   | CTTTAGGTTT | TGTTTTTTA  | TTTACTGTGG | GGGGTTTAAC | TGGTGTATT  | TTATCTAATT | CTTCATTGGA |   |
| NC048990.1-Ch |            |            |             |            |            |            |            |            |            |            |   |
| KY922482.1-UK |            | T          |             |            |            |            |            |            |            |            |   |
| GN-KOR1       |            |            |             |            |            |            |            |            |            |            |   |
| JN-KOR2       |            |            |             |            |            |            |            |            |            |            |   |
| GN-KOR3       |            |            |             |            |            |            |            |            |            |            |   |
| GB-KOR1       |            |            |             |            |            |            |            |            |            |            |   |
| JN-KOR4       |            |            |             |            |            |            |            |            |            |            |   |
| JN-KOR1       |            |            |             |            |            |            |            |            |            |            |   |
| GG-KOR1       |            | T          |             |            |            |            |            |            | C          |            |   |
| CN-KOR1       |            |            |             |            |            |            |            |            |            |            |   |
| CB-KOR1       |            |            |             |            |            |            |            |            |            |            |   |
| CB-KOR2       |            |            |             |            |            |            |            |            |            |            |   |
| JN-KOR3       |            |            |             |            |            |            |            |            |            |            |   |
| GB-KOR2       |            |            |             |            |            |            |            |            |            |            |   |
| GN-KOR2       |            |            |             |            |            |            |            |            |            |            |   |
| JB-KOR2       |            |            |             |            |            |            |            |            |            |            |   |
| JB-KOR1       |            |            |             |            | A          |            |            |            |            |            |   |
| GW-KOR1       |            |            |             |            |            |            |            |            |            |            |   |
| CN-KOR2       |            |            |             |            |            |            |            |            |            |            |   |
| CN-KOR3       |            |            |             |            |            |            |            |            |            |            |   |
| JB-KOR3       |            |            |             |            |            |            |            |            |            |            |   |
|               | 1010       | 1020       | 1030        | 1040       | 1050       | 1060       | 1070       | 1080       | 1090       | 1100       |   |
| MN073839.1-Ch | TGTTTCATA  | CACGATACAT | ACTAAGTTGT  | AGCTCATTTC | CAATATGTTT | TATCTATGGG | GGCTGTTTT  | GCTATTATAT | CAGGTATTAC | CCATTGATTC |   |
| NC048990.1-Ch |            |            |             |            |            |            |            |            |            |            |   |
| KY922482.1-UK |            |            |             |            |            |            |            |            |            |            |   |
| GN-KOR1       | C          |            |             |            |            |            | C          |            |            |            |   |
| JN-KOR2       |            |            |             |            |            |            | C          |            |            |            |   |
| GN-KOR3       |            |            |             |            |            |            | C          |            |            |            |   |
| GB-KOR1       |            |            |             |            |            |            | C          |            |            |            |   |
| JN-KOR4       |            |            |             |            |            |            | C          |            |            |            |   |
| JN-KOR1       |            |            |             |            |            |            | C          |            |            |            |   |
| GG-KOR1       |            |            |             |            |            |            | C          |            |            |            |   |
| CN-KOR1       |            |            |             |            |            |            | C          |            |            |            |   |
| CB-KOR1       |            |            |             |            |            |            | C          |            |            |            |   |
| CB-KOR2       |            |            |             |            |            |            | C          |            |            |            |   |
| JN-KOR3       |            |            |             |            |            |            | C          |            |            |            |   |
| GB-KOR2       |            |            |             |            |            |            | C          |            |            |            |   |
| GN-KOR2       |            |            |             |            |            |            | C          |            |            |            |   |
| JB-KOR2       |            | C          |             |            |            |            | C          |            |            |            |   |
| JB-KOR1       |            |            |             |            |            |            | C          |            |            |            |   |
| GW-KOR1       |            |            |             |            |            |            | C          |            |            |            |   |
| CN-KOR2       |            | C          |             |            |            |            | C          |            |            |            |   |
| CN-KOR3       |            | C          |             |            |            |            | C          |            |            |            |   |
| JB-KOR3       |            |            |             |            |            |            | C          |            |            |            | T |
|               | 1110       | 1120       | 1130        |            |            |            |            |            |            |            |   |
| MN073839.1-Ch | CCTTACTCTT | ATAATATGCG | TATAAACCCCT | TACTATT    |            |            |            |            |            |            |   |
| NC048990.1-Ch |            |            |             |            |            |            |            |            |            |            |   |
| KY922482.1-UK |            |            |             |            |            |            |            |            |            |            |   |
| GN-KOR1       |            |            |             |            |            |            |            |            |            |            |   |
| JN-KOR2       |            |            |             |            |            |            |            |            |            |            |   |
| GN-KOR3       |            |            |             |            |            |            |            |            |            |            |   |
| GB-KOR1       |            |            |             |            |            |            |            |            |            |            |   |
| JN-KOR4       |            |            |             |            |            |            |            |            |            |            |   |
| JN-KOR1       |            |            |             |            |            |            |            |            |            |            |   |
| GG-KOR1       |            |            |             |            |            |            |            |            |            |            |   |
| CN-KOR1       |            |            |             |            |            |            |            |            |            |            |   |
| CB-KOR1       |            |            |             |            |            |            |            |            |            |            |   |
| CB-KOR2       |            |            |             |            |            |            |            |            |            |            |   |
| JN-KOR3       |            |            |             |            |            |            |            |            |            |            |   |
| GB-KOR2       |            |            |             |            |            |            |            |            |            |            |   |
| GN-KOR2       |            |            |             |            |            |            |            |            |            |            |   |
| JB-KOR2       |            | A          |             |            |            |            |            |            |            |            |   |
| JB-KOR1       |            |            |             |            |            |            |            |            |            |            |   |
| GW-KOR1       |            |            |             |            |            |            |            |            |            |            |   |
| CN-KOR2       |            |            |             |            |            |            |            |            |            |            |   |
| CN-KOR3       |            |            |             |            |            |            |            |            |            |            |   |
| JB-KOR3       |            | A          |             |            |            |            |            |            |            |            |   |

**Figure S1.** Multiple alignments of the differing nucleotide positions in the *COI* gene of *Carpoglyphus lactis*. A comparison was conducted between the *COI* sequence (1,137 nucleotides) of *C. lactis* mite isolated from the ROK in this study and the published sequence in GenBank. The highlighted blue frame signified shared nucleotide differences between the isolated strains and those from China (NCBI accession nos.: NC\_048990.1, MN073839.1) and the UK (NCBI accession no. KY922482.1).
